# Supplementary material for: Effectiveness and cost-effectiveness of a sustainable obesity prevention programme for preschool children delivered at scale ‘HENRY’ (Health, Exercise, Nutrition for the Really Young): protocol for the HENRY III cluster randomised controlled trial
Source: HighWire-hosted journal article supplement (doi:10.1136/bmjopen-2023-081861), 2024-03-01
Supplement: bmjopen-2023-081861supp001_data_supplement.pdf [file bmjopen-2023-081861supp001_data_supplement.pdf]

Supplementary Table 1 Data collection summary

| Data/outcomes                              | Measures                    | Collected by         | LA <sup>c</sup> / CC <sup>d</sup> Screening and consent | Centre baseline | Participant screening | Participant informed consent and registration | Participant / staff Baseline | Short term follow-up (12 months post registration) | Medium-term follow-up (3 years) <sup>a</sup> | Longer term follow-up <sup>b</sup> |
|--------------------------------------------|-----------------------------|----------------------|---------------------------------------------------------|-----------------|-----------------------|-----------------------------------------------|------------------------------|----------------------------------------------------|----------------------------------------------|------------------------------------|
| Local authority                            |                             |                      |                                                         |                 |                       |                                               |                              |                                                    |                                              |                                    |
| Eligibility                                | LA Eligibility checklist    | LA self complete     | x                                                       |                 |                       |                                               |                              |                                                    |                                              |                                    |
| Basic demographics / reasons for declining | LA / CC Recruitment log     | Researcher / HENRY   | x                                                       |                 |                       |                                               |                              |                                                    |                                              |                                    |
| Centre contact details                     | Centre nomination form      | LA self complete     | x                                                       |                 |                       |                                               |                              |                                                    |                                              |                                    |
| Local authority agreement / consent        | Local authority agreement   | LA self complete     | x                                                       |                 |                       |                                               |                              |                                                    |                                              |                                    |
| Centre                                     |                             |                      |                                                         |                 |                       |                                               |                              |                                                    |                                              |                                    |
| Eligibility                                | LA Eligibility checklist    | LA self complete     | x                                                       |                 |                       |                                               |                              |                                                    |                                              |                                    |
| Reasons for declining / ineligibility      | LA / CC recruitment log     | Researcher           | x                                                       |                 |                       |                                               |                              |                                                    |                                              |                                    |
| Centre agreement / consent                 | Children's Centre agreement | Centre self complete | x                                                       |                 |                       |                                               |                              |                                                    |                                              |                                    |

| Data/outcomes                           | Measures                                             | Collected by                                | LA <sup>c</sup> / CC <sup>d</sup> Screening and consent | Centre baseline | Participant screening | Participant informed consent and registration | Participant / staff Baseline | Short term follow-up (12 months post registration) | Medium-term follow-up (3 years) <sup>a</sup> | Longer term follow-up <sup>b</sup> |
|-----------------------------------------|------------------------------------------------------|---------------------------------------------|---------------------------------------------------------|-----------------|-----------------------|-----------------------------------------------|------------------------------|----------------------------------------------------|----------------------------------------------|------------------------------------|
| Stratification factors                  | Children's centre nomination form                    | LA self complete                            |                                                         | x               |                       |                                               |                              |                                                    |                                              |                                    |
| Centre randomisation allocation         | Randomisation form                                   | CTRU <sup>e</sup>                           |                                                         | x               |                       |                                               |                              |                                                    |                                              |                                    |
| Demographics                            | Centre nomination form / Environmental Questionnaire | LA / Centre self complete                   |                                                         | x               |                       |                                               |                              |                                                    |                                              |                                    |
| Details of other courses                | Environmental Questionnaire                          | Centre self complete                        |                                                         | x               |                       |                                               |                              | x                                                  | x                                            |                                    |
| Parent                                  |                                                      |                                             |                                                         |                 |                       |                                               |                              |                                                    |                                              |                                    |
| Initial eligibility check               | Screening form                                       | Centre staff                                |                                                         |                 | x                     |                                               |                              |                                                    |                                              |                                    |
| Confirmation of eligibility             | Eligibility checklist                                | LCRN <sup>f</sup>                           |                                                         |                 |                       | x                                             |                              |                                                    |                                              |                                    |
| Reasons for declining / ineligibility   | Screening form                                       | Parent self complete                        |                                                         |                 | x                     |                                               |                              |                                                    |                                              |                                    |
| Demographics (parent, child and family) | Screening form Baseline form                         | Parent self complete CTRU (recruitment log) |                                                         |                 | x                     |                                               | x                            |                                                    |                                              |                                    |

| Data/outcomes                                                                                                 | Measures                        | Collected by                                                                     | LA <sup>c</sup> / CC <sup>d</sup> Screening and consent | Centre baseline | Participant screening | Participant informed consent and registration | Participant / staff Baseline | Short term follow-up (12 months post registration) | Medium-term follow-up (3 years) <sup>a</sup> | Longer term follow-up <sup>b</sup> |
|---------------------------------------------------------------------------------------------------------------|---------------------------------|----------------------------------------------------------------------------------|---------------------------------------------------------|-----------------|-----------------------|-----------------------------------------------|------------------------------|----------------------------------------------------|----------------------------------------------|------------------------------------|
| Consent to trial participation and data collection (including NCMP)                                           | Consent form                    | Parent self complete                                                             |                                                         |                 |                       | x                                             |                              |                                                    |                                              |                                    |
| Use of Centres                                                                                                | Baseline form<br>Follow up form | LCRN                                                                             |                                                         |                 |                       |                                               | x                            | x                                                  | x                                            |                                    |
| Outcomes                                                                                                      |                                 |                                                                                  |                                                         |                 |                       |                                               |                              |                                                    |                                              |                                    |
| Child age and sex adjusted BMI Z-score, child height, child weight, unadjusted BMI and weight/BMI percentiles | Measured                        | LCRN (baseline & 12 M follow-up)<br><br>Longer term: CTRU accessing routine data |                                                         |                 |                       |                                               | x                            | x                                                  | x                                            |                                    |
| Sibling age and sex adjusted BMI, height (m), weight (kg), unadjusted BMI and weight/BMI percentiles          |                                 | CTRU accessing routine data                                                      |                                                         |                 |                       |                                               |                              |                                                    | x                                            |                                    |
| Parent self-efficacy                                                                                          | Dumka (27)                      | LCRN                                                                             |                                                         |                 |                       |                                               | x                            | x                                                  |                                              |                                    |
| Family eating / activities                                                                                    | Golan (28)                      | LCRN                                                                             |                                                         |                 |                       |                                               | x                            | x                                                  |                                              |                                    |
| Feeding questionnaire                                                                                         | Baughcum (29)                   | LCRN                                                                             |                                                         |                 |                       |                                               | x                            | x                                                  |                                              |                                    |

| Data/outcomes                                                                 | Measures                    | Collected by                  | LA <sup>c</sup> / CC <sup>d</sup> Screening and consent | Centre baseline | Participant screening | Participant informed consent and registration | Participant / staff Baseline | Short term follow-up (12 months post registration) | Medium-term follow-up (3 years) <sup>a</sup> | Longer term follow-up <sup>b</sup> |
|-------------------------------------------------------------------------------|-----------------------------|-------------------------------|---------------------------------------------------------|-----------------|-----------------------|-----------------------------------------------|------------------------------|----------------------------------------------------|----------------------------------------------|------------------------------------|
| Dental health (child)                                                         | Dental questionnaire        | LCRN                          |                                                         |                 |                       |                                               | x                            | x                                                  |                                              |                                    |
| Parent height & weight:                                                       | Measured                    | LCRN                          |                                                         |                 |                       |                                               | x                            | x                                                  |                                              |                                    |
| Parent waist circumference                                                    | Measured                    | LCRN                          |                                                         |                 |                       |                                               | x                            | x                                                  |                                              |                                    |
| Staff:                                                                        |                             |                               |                                                         |                 |                       |                                               |                              |                                                    |                                              |                                    |
| Staff screening                                                               | Staff screening form        | Staff self complete at centre |                                                         | x               |                       |                                               |                              |                                                    |                                              |                                    |
| Staff height & weight                                                         | Measured                    | Self-measure                  |                                                         |                 |                       |                                               | x                            | x                                                  |                                              |                                    |
| Staff waist circumference                                                     | Measured                    | Self-measure                  |                                                         |                 |                       |                                               | X                            | x                                                  |                                              |                                    |
| Children's Centre:                                                            |                             |                               |                                                         |                 |                       |                                               |                              |                                                    |                                              |                                    |
| Centre social, physical and political environment (e.g. policies around food) | Environmental questionnaire | Centre self complete          |                                                         | x               |                       |                                               |                              | x                                                  |                                              |                                    |
| Safety:                                                                       |                             |                               |                                                         |                 |                       |                                               |                              |                                                    |                                              |                                    |

| Data/outcomes                                                                  | Measures                        | Collected by                | LA <sup>c</sup> / CC <sup>d</sup> Screening and consent | Centre baseline | Participant screening | Participant informed consent and registration | Participant / staff Baseline | Short term follow-up (12 months post registration) | Medium-term follow-up (3 years) <sup>a</sup> | Longer term follow-up <sup>b</sup> |
|--------------------------------------------------------------------------------|---------------------------------|-----------------------------|---------------------------------------------------------|-----------------|-----------------------|-----------------------------------------------|------------------------------|----------------------------------------------------|----------------------------------------------|------------------------------------|
| Adverse events / unintended consequences                                       | SAE / RUSAE forms               | LCRN / centre self complete |                                                         |                 |                       |                                               |                              | x                                                  |                                              |                                    |
| Health economics:                                                              |                                 |                             |                                                         |                 |                       |                                               |                              |                                                    |                                              |                                    |
| Health care resource use for child                                             | Resource use questionnaire      | LCRN                        |                                                         |                 |                       |                                               | x                            | x                                                  |                                              |                                    |
| Health care resource use for parents                                           | Resource use questionnaire      | LCRN                        |                                                         |                 |                       |                                               | x                            | x                                                  |                                              |                                    |
| Private costs (e.g. travel costs, additional food expenses, lost productivity) | Resource use questionnaire      | LCRN                        |                                                         |                 |                       |                                               | x                            | x                                                  |                                              |                                    |
| Parent's Health-related Quality of Life                                        | EQ-5D-5L (30) and ICECAP-A [31] | LCRN                        |                                                         |                 |                       |                                               | x                            | x                                                  |                                              |                                    |
| Routine data:                                                                  |                                 |                             |                                                         |                 |                       |                                               |                              |                                                    |                                              |                                    |
| NCMP Child and sibling data (trial participants)                               |                                 | CTRU                        |                                                         |                 |                       |                                               |                              |                                                    | x                                            |                                    |
| NCMP regional child data (not trial participants)                              |                                 | CTRU                        |                                                         |                 |                       |                                               |                              |                                                    | x                                            |                                    |

| Data/outcomes                                                                                                    | Measures                 | Collected by                           | LA <sup>c</sup> / CC <sup>d</sup><br>Screening and consent | Centre baseline | Participant screening | Participant informed consent and registration | Participant / staff Baseline | Short term follow-up (12 months post registration) | Medium-term follow-up (3 years) <sup>a</sup> | Longer term follow-up <sup>b</sup> |
|------------------------------------------------------------------------------------------------------------------|--------------------------|----------------------------------------|------------------------------------------------------------|-----------------|-----------------------|-----------------------------------------------|------------------------------|----------------------------------------------------|----------------------------------------------|------------------------------------|
| Process evaluation/delivery of HENRY programmes:                                                                 |                          |                                        |                                                            |                 |                       |                                               |                              |                                                    |                                              |                                    |
| Attendance *<br>*Data collection not timed to trial time points                                                  | HENRY attendance records | HENRY Centre staff / HENRY facilitator |                                                            |                 |                       |                                               |                              |                                                    |                                              |                                    |
| Contamination checks*<br>*Data collection not timed to trial time points                                         | Staff movement form      | Staff self complete                    |                                                            |                 |                       |                                               |                              |                                                    |                                              |                                    |
| HENRY training attendance and knowledge                                                                          |                          | HENRY                                  |                                                            |                 |                       |                                               |                              | x                                                  | x                                            |                                    |
| Qualitative data                                                                                                 |                          |                                        |                                                            |                 |                       |                                               |                              |                                                    |                                              |                                    |
| System map and sub maps*<br>*Data collection not timed to trial time points                                      | n/a                      | Researcher                             |                                                            |                 |                       |                                               |                              |                                                    |                                              |                                    |
| Systems mapping interviews with local authority stakeholders*<br>*Data collection not timed to trial time points | n/a                      | Researcher                             |                                                            |                 |                       |                                               |                              |                                                    |                                              |                                    |

| Data/outcomes                                                                    | Measures | Collected by | LA <sup>c</sup> / CC <sup>d</sup> Screening and consent | Centre baseline | Participant screening | Participant informed consent and registration | Participant / staff Baseline | Short term follow-up (12 months post registration) | Medium-term follow-up (3 years) <sup>a</sup> | Longer term follow-up <sup>b</sup> |
|----------------------------------------------------------------------------------|----------|--------------|---------------------------------------------------------|-----------------|-----------------------|-----------------------------------------------|------------------------------|----------------------------------------------------|----------------------------------------------|------------------------------------|
| Interviews with centre staff*<br>*Data collection not timed to trial time points | n/a      | Researcher   |                                                         |                 |                       |                                               |                              |                                                    |                                              |                                    |
| Interviews with parents*<br>**Data collection not timed to trial time points     | n/a      | Researcher   |                                                         |                 |                       |                                               |                              |                                                    |                                              |                                    |

<sup>a</sup> Medium term outcomes will gathered from routinely collected data (from health visitors and/or the National Child Measurement Programme)

<sup>b</sup> Longer term outcomes will be based on matched cohorts of (Millennium Cohort Study (MCS ((21))).

<sup>c</sup> Local Authority (or other governing/commissioning body)

<sup>d</sup> Children’s centre (or other setting in which HENRY can be delivered, including Sure Start centres in Northern Ireland)

<sup>e</sup> Clinical Trials Research Unit

<sup>f</sup> Local Clinical Research Network (England only). Other devolved nations will train researchers/equivalent staff to collect data)
